# Supplementary material for: Growing aridity poses threats to global land surface
Source: Springer Nature journal article supplement (doi:10.1038/s43247-024-01935-1), 2024-12-19
Supplement: 43247_2024_1935_MOESM2_ESM.pdf [file 43247_2024_1935_MOESM2_ESM.pdf]

1

2

3

4

5

6

**Supplementary note**

7

8

9

10

11

12

13

14

15

16

17

18

19

20 Table S1. The main arid areas of the world and their more important constrains associated to aridity intensification, the main measures to drought  
 21 adaptation done, their main results and the more general needs to potentiate in the future to try to avoid the negative effects of drought on degradation,  
 22 food scarcity and human wellness association to aridity rise.

23

| Region | Main hazards together with aridity rise                                                                                 | Main adaptation measures                                                                                                                                                                                                                                                                                                                                                                                                                                                                                                                                                                                                                                | Main results of adaptation measures                                                                                                                                                                                                                                                                                                                                                                      | Future projection and main advises                                                                                                                                                                                                                                                                                                                                      |
|--------|-------------------------------------------------------------------------------------------------------------------------|---------------------------------------------------------------------------------------------------------------------------------------------------------------------------------------------------------------------------------------------------------------------------------------------------------------------------------------------------------------------------------------------------------------------------------------------------------------------------------------------------------------------------------------------------------------------------------------------------------------------------------------------------------|----------------------------------------------------------------------------------------------------------------------------------------------------------------------------------------------------------------------------------------------------------------------------------------------------------------------------------------------------------------------------------------------------------|-------------------------------------------------------------------------------------------------------------------------------------------------------------------------------------------------------------------------------------------------------------------------------------------------------------------------------------------------------------------------|
| Sahel  | <ul style="list-style-type: none"> <li>-Soil degradation</li> <li>-Overgrazing</li> <li>-Population Increase</li> </ul> | <p><b>-Active measures of stakeholders such as:</b></p> <ul style="list-style-type: none"> <li>-Agroforestry</li> <li>-Migration</li> <li>-Diversification of livestock species to more adapted to drought</li> <li>-Training in livestock health protection</li> <li>-Income diversification by work in no farm works</li> <li>-Reduction in herd size</li> <li>-Integration of livestock with crop husbandry</li> </ul> <p><b>2/Institutional (Governmental, non-governmental of national and international level) measures:</b></p> <ul style="list-style-type: none"> <li>-Mainly based in irrigation, water saving and crop development</li> </ul> | <ul style="list-style-type: none"> <li>-The stateholders food security when have adopted at least one of the adaptative measures have achieved increase the level of food security to 7-9%</li> <li>-The institutional measures, despite have in some cases moved great financial tools have had limited general impact in the food production and in mitigate the desertification processes.</li> </ul> | <ul style="list-style-type: none"> <li>-Sustainable drip irrigation in areas where it is effectively possible</li> <li>-Economy diversification and development</li> <li>-Political conflicts solution</li> <li>-Sustainable herds sizes and minimize soil and vegetation degradation.</li> <li>-Conservation and favoring the existence of big woody plants</li> </ul> |

|              |                                                                                                                                                                                                     |                                                                                                                                                                                                                                                       |                                                              |                                                                                                                                                                                                                                                                                                                                                                                                                                                                                                                              |
|--------------|-----------------------------------------------------------------------------------------------------------------------------------------------------------------------------------------------------|-------------------------------------------------------------------------------------------------------------------------------------------------------------------------------------------------------------------------------------------------------|--------------------------------------------------------------|------------------------------------------------------------------------------------------------------------------------------------------------------------------------------------------------------------------------------------------------------------------------------------------------------------------------------------------------------------------------------------------------------------------------------------------------------------------------------------------------------------------------------|
| South Africa | <ul style="list-style-type: none"> <li>- Great population increase</li> <li>- Soil and vegetation degradation</li> </ul>                                                                            | <ul style="list-style-type: none"> <li>-Increase of irrigation and improved seed varieties</li> <li>-Selection of crop species</li> <li>-Local markets improvement</li> <li>-Governmental projects to improve food security</li> </ul>                | -No success in general, observed a decrease in food security | <ul style="list-style-type: none"> <li>-Recent studies advised as adequate measures to control desertification and improve food security in a realistic view include:</li> <li>-Control of soil erosion and adequate afforestation and reforestation</li> <li>-Improve water management (more resources to build infrastructures for water saving and drip irrigation implementation) and agronomic practices (no-tillage, short season crops) with great effort to promote more adequate crops in a dry scenario</li> </ul> |
| MENA region  | <ul style="list-style-type: none"> <li>1/Israel and Arabian Peninsula rich countries</li> <li>-Political conflicts</li> <li>-Economy income dependent from petroleum (Arabian Peninsula)</li> </ul> | <ul style="list-style-type: none"> <li>-Water saving and desalinization</li> <li>-Water recycling</li> <li>-Ecosystems restoration and afforestation</li> <li>-Research and use of crop and wild plant varieties more resistant to drought</li> </ul> | -High level of success                                       | -Follow with the current level of investment in the technological application to increase water use efficiency, restore natural systems and smart agriculture.                                                                                                                                                                                                                                                                                                                                                               |
|              | <ul style="list-style-type: none"> <li>2/Poor countries:</li> <li>-Fast population increases</li> </ul>                                                                                             | <ul style="list-style-type: none"> <li>-Dam construction</li> <li>-Adaptations at the level of stakeholders</li> </ul>                                                                                                                                | -Scarce success and maladaptation                            | -Decrease the dependence of rain-fed agriculture                                                                                                                                                                                                                                                                                                                                                                                                                                                                             |

|                                    |                                                                                                                                                                                                                                                                                              |                                                                                                                                                                                            |                                                                                                                                                                                                                                                                    |                                                                                                                                                                                                                                                                                                                                                            |
|------------------------------------|----------------------------------------------------------------------------------------------------------------------------------------------------------------------------------------------------------------------------------------------------------------------------------------------|--------------------------------------------------------------------------------------------------------------------------------------------------------------------------------------------|--------------------------------------------------------------------------------------------------------------------------------------------------------------------------------------------------------------------------------------------------------------------|------------------------------------------------------------------------------------------------------------------------------------------------------------------------------------------------------------------------------------------------------------------------------------------------------------------------------------------------------------|
|                                    | <ul style="list-style-type: none"> <li>-Rural abandonment and migration to urban areas</li> <li>-Soil degradation</li> <li>-Political insecurity</li> <li>-Food scarcity and strong national income dependence of agriculture and livestock</li> <li>- Lack of economic resources</li> </ul> | <ul style="list-style-type: none"> <li>- Scarce Institutional-Governmental initiatives</li> </ul>                                                                                          |                                                                                                                                                                                                                                                                    | <ul style="list-style-type: none"> <li>-Apply new technologies of desalinization and water recycling</li> <li>-Development of smart agriculture</li> <li>-Increasing inter-countries cooperation</li> <li>-Protect the natural vegetation and restoration where possible.</li> <li>-Increase the adaptative capacity at the stakeholders' level</li> </ul> |
| Central Asia, Gobi and North China | <p>1/China</p> <ul style="list-style-type: none"> <li>-Great soil degradation</li> </ul>                                                                                                                                                                                                     | <ul style="list-style-type: none"> <li>-Stakeholders adaptation</li> <li>-Great Governmental programs (water saving agriculture, reforestation, afforestation, soil protection)</li> </ul> | <ul style="list-style-type: none"> <li>- Increasing of vegetation cover and soil quality, but with different level of success depending on the region</li> <li>-Excessive afforestation such as in Inner Mongolia have proved to induce water scarcity.</li> </ul> | <ul style="list-style-type: none"> <li>-Use of native non-tree species should be reconsidered in several areas for restoration programs.</li> <li>-Continue the implementation of water saving agriculture</li> </ul>                                                                                                                                      |
|                                    | <p>2/The rest: non-China part</p> <ul style="list-style-type: none"> <li>-Great lack of data and information.</li> <li>-Dominance of C3 metabolism plants over C4 in natural vegetation communities</li> <li>-Pollution by massive use of pesticides and fertilizers</li> </ul>              | <ul style="list-style-type: none"> <li>-Some recent Governmental initiatives</li> </ul>                                                                                                    | <ul style="list-style-type: none"> <li>-Scarce success and in general increase of degradation and loss of plant cover and water sources</li> </ul>                                                                                                                 | <ul style="list-style-type: none"> <li>-Changes in cropping patters such as implementation of regenerative agriculture</li> <li>-Afforestation of degraded croplands</li> <li>-Natural vegetation restoration</li> </ul>                                                                                                                                   |

|                              |                                                                                          |                                                                                                                                                                                                                                                       |                                                                                                                                                                                                                                                                                   |                                                                                                                                                                                                                                                                                                          |
|------------------------------|------------------------------------------------------------------------------------------|-------------------------------------------------------------------------------------------------------------------------------------------------------------------------------------------------------------------------------------------------------|-----------------------------------------------------------------------------------------------------------------------------------------------------------------------------------------------------------------------------------------------------------------------------------|----------------------------------------------------------------------------------------------------------------------------------------------------------------------------------------------------------------------------------------------------------------------------------------------------------|
|                              | - Great drop in water resources (i.e. Aral catastrophe) in the last decades              |                                                                                                                                                                                                                                                       |                                                                                                                                                                                                                                                                                   | -Improving water-use efficiency<br>-Use of more drought resistant genotypes to drought                                                                                                                                                                                                                   |
| European Mediterranean Basin | -Crop irrigation expansion<br>-Pollution<br>-Some conflicts for water sources            | -Diverse European Union and national initiatives with considerable budget addressed to water policy and increase water use-efficiency, to restoration and protection of biodiversity and protect the most pristine ecosystems                         | -Diverse level of success. The measures have helped to drought adaptation in several agriculture sectors and protect some natural valuable areas and species. However, several aspects to increase water saving and better use efficiency remains to be done                      | -Need to improve water sources, mainly in south Europe,<br>- More intense and more sources should be allocated to stop desertification in some important areas of South Europe.<br><br>More efficient control and laws to warrants a more smart and adequate species cultivated, mainly in South Europe. |
| Australia                    | -Very low soil nutritional capacity and specially very low concentrations of phosphorus. | -Great governmental and Commonwealth programs to invest directly in economically incentives and compensations to farmers and in infrastructures building and technological application, and also to soil restoration, reforestation and afforestation | -Some problems with inadequate and/or excessive afforestation that decrease the streams and river flows and marshes water content in some cases. But in general restoration and reforestation have had good results.<br>-Wade trade have created more problems than it has solved | - Science integrated with stakeholder input into developing climate adaptation practices and technologies and effective adoption paths particularly to deal with climate extremes                                                                                                                        |

|                                               |                                                                                                                                                                                                              |                                                                                                                                                                                                                                                 |                                                                                                                                                                                                                                                                                        |                                                                                                                                                                                                                                                                                                                                                                     |
|-----------------------------------------------|--------------------------------------------------------------------------------------------------------------------------------------------------------------------------------------------------------------|-------------------------------------------------------------------------------------------------------------------------------------------------------------------------------------------------------------------------------------------------|----------------------------------------------------------------------------------------------------------------------------------------------------------------------------------------------------------------------------------------------------------------------------------------|---------------------------------------------------------------------------------------------------------------------------------------------------------------------------------------------------------------------------------------------------------------------------------------------------------------------------------------------------------------------|
| <p>North Brazil</p>                           | <p>- Lack of coordinated collaboration among not only Federal and States governments, but also among institutions within their own jurisdiction, create difficulties to design a drought management plan</p> | <p>-Governmental programs mainly addressed to improve water infrastructures, diversification of agriculture and livestock production systems, reforestation and afforestation, mitigate soil erosion and rise the access to public programs</p> | <p>- Several important variables have been achieved such as more stakeholders water access, more income from institutions to farmers, improvement of the articulation between distinct actors, protection of biodiversity and soil and increasing of soil organic carbon.</p> <p>-</p> | <p>-It is necessary continue working for more in integrate actions and tools for adaptation, combining technology-based solutions with in-depth knowledge of local and regional social, economic, and cultural aspects.</p> <p>-Invest more research and sources in proactive pre-disaster rather than reactive post-disaster events associated to aridity rise</p> |
| <p>South West of North America (only USA)</p> | <p>-Economical conflicts by water supply between urbanization and cropland sustainability<br/>-Population and economy expansion<br/>-Great wind erosion and dust transport</p>                               | <p>-Several state and central governmental initiatives overall in the context of infrastructure for water storing and saving, forest management and reforestation, research, water cycling and desalinization</p>                               | <p>-Despite has bracket significantly the aridity consequences the measures have been insufficient to avoid deforestation, fires, drop of water availability and the socio-economic problems linked to the rise in aridity.</p>                                                        | <p>-Southwest USA will also require planning, cooperation, and integration that surpass previous efforts in terms of geographic scope, jurisdictional breadth, multisectoral engagement, and the length of planning timelines</p> <p>-Policy measures, technical innovations and market-based solution sure that can improve water supply</p>                       |

|  |  |  |  |                                                                                                                                                            |
|--|--|--|--|------------------------------------------------------------------------------------------------------------------------------------------------------------|
|  |  |  |  | capacity and improve water demand at once.<br>-Advance (including at technological level) is another pending question to advance in increase water sources |
|--|--|--|--|------------------------------------------------------------------------------------------------------------------------------------------------------------|

24

25

26

27

28

29

30

31

32

33

34

35

36

37

## 38 **6.1. Africa**

39 Three distinct regions in Africa are particularly vulnerable to the expansion of low diversity arid areas:  
40 the Sudano-Sahelian region, the Kakahari-Namib region in southern Africa, and the Mediterranean  
41 Africa. Desertification affects approximately one-third of Africa (Darkoh, 1998; Msangi, 2004).  
42 Technological, institutional and policy solutions are crucial for managing drought and climate variability  
43 in vulnerable communities across these regions (Shiferaw et al., 2014).

44

### 45 **6.1.1 Sahel**

46 Despite significant investments by governmental and non-governmental organizations, primarily in  
47 water-saving and irrigation projects, the results in terms of reducing vulnerability among local populations  
48 have been weak (Baba, 2014; Keita et al., 2022). For example, the ambitious "Great Green Wall" plan  
49 proposed in the 1980s to plant a continuous barrier of trees from Senegal to Djibouti has not been widely  
50 implemented (O'Connor & Ford, 2014) and would likely further damage the biodiversity through plant  
51 nonnative tree species, and planting trees in conditions where they are unlikely to survive (Hochard, 2022).  
52 Effective measures to address the consequences of aridity rise in the Sahel region need broader application,  
53 as the loss of C and nutrient stocks in plant-soil systems and desertification continue to advance (Maïga-  
54 Yaleu et al., 2015; Yang et al., 2022). Policy strategies aimed at increasing private rangeland enclosures to  
55 promote pastoralist sedentarization should also be reconsidered due to climate-induced risks and pastoral  
56 livelihood vulnerability (Berhanu & Beyene, 2015; Eliza et al., 2015).

57

### 58 **6.1.2 South Africa**

59 The rise in aridity in several currently arid areas is a significant concern in South Africa, stretching from  
60 Congo to the South African Republic (Nhamo et al., 2019a; 2019b). Recurring droughts, influenced by the  
61 El Niño Southern Oscillation (ENSO), continue to impact the region's people, economy, and environment.  
62 Average rainfall in the region has decreased on average by 25.6% between 1960 and 2007, and agricultural  
63 productivity is projected to decline by 15% to 50% (Davis & Vicent, 2017; Nhemachena et al., 2020).

64

### 65 **6.1.3. MENA**

66 *Adapting to Aridity in North Africa, the Middle East, and Western Asia:*

67 This vast region, encompassing North Africa, the northeastern part of Africa, the Middle East, and countries  
68 in western Asia, faces significant challenges due to its strong economic dependence on agriculture. Drought  
69 risk management varies across countries, presenting a complex landscape. The greatest challenge across  
70 most of these countries is the urgent need to improve drought risk management, often with inadequate or  
71 absent governmental intervention (Sowers et al., 2011; Wodon et al., 2014; Waha et al., 2017; Schilling et  
72 al., 2020; Jedd et al., 2021). The combined effects of regional population growth and warming exacerbate  
73 the situation by reducing water supplies in areas where irrigated agriculture is essential for production  
74 (Waha et al., 2017; Garrido & Rabi, 2016) (Table S1).

75



## 76 **6.2. Central Asia, Gobi, and North China:**

77 Central Asia has experienced a temperature increase of 0.18°C per decade during 1901–2003, twice the  
78 rate of the overall Northern Hemisphere (Chen et al., 2009). A "wet-west and dry-east" anomaly pattern,  
79 marked by changes in precipitation and aridity indices, has emerged in the expanded drylands of northern  
80 China (Chen et al., 2011; Wang et al., 2013). Modeling studies project an expansion of desert areas in  
81 Central Asia due to global warming (Ma et al., 2021).

82 Central Asia faces the cumulative impact of prolonged droughts, a cold climate subject to warming  
83 effects, and severe dust storms (Kurosaki et al., 2011b; Nandintsetseg & Shinoda, 2015). Winter warming  
84 also influences plant communities, and may drive desertification (Huang et al., 2012; Shinoda, 2017) (Table  
85 S1). In response, interdisciplinary initiatives like the "Applied Multi Risk Mapping of Natural Hazards for  
86 Impact Assessment" (ARMONIA, 2007) and "Integrating Dryland Disaster Science" (Shinoda, 2017) have  
87 been launched in Central Asia. These projects aim to integrate studies, identify and prevent multi-hazard  
88 risks, and develop proactive countermeasures for sustainable development (Kappes et al., 2012; Gill &  
89 Malamud, 2014). The region faces challenges from past Soviet-era policies, including massive irrigation  
90 (e.g., the Aral Sea disaster) and extensive pesticide and fertilizer use, as well as the decline of forest  
91 management systems (Lioubimtseva & Cole, 2007; Lioubimtseva & Henebry, 2009; Schlüter & Herrfahrdt-  
92 Pähle, 2011; Aleksandrova, et al., 2014). Wild woody vegetation has been proved to be reduced by aridity  
93 increases (Zou et al., 2020). However, in the last decade the Governments have initiated some programs  
94 for drought adaptation in the context of water saving, agriculture, biodiversity and forest restoration as  
95 priorities (Mustaeva & Kartayena, 2018).

96 China has 6.6 million km<sup>2</sup> of drylands that support approximately 580 million people. Despite several  
97 programs have been executed or are going on to assessment and combat desertification, degradation  
98 continues to expand and is approaching sustainable water resource limits (Yang et al., 2005; Xu et al., 2009;  
99 Feng et al., 2016; Xiao et al., 2020). Vegetation cover has increased rapidly since 2003 because of  
100 ecological recovery projects and policies (Yuan et al., 2016; Zhou et al., 2021) (Table S1). For example,  
101 the "Grain-for-Green" (GFG) program initiated in 1999 in northern Shaanxi has counteracted aridification  
102 through targeted afforestation (Li & Lu, 2015; Yuan et al., 2016). The drying trend of this region was  
103 changed by the influence of vegetation restoration promoted by the GFG program the aridity decreased by  
104 0.14% to 2.32% per year during 2000–2012, and the mean vegetation coverage as indicated by EVI  
105 increased by 0.90% to 4.32% per year at county level. In parallel, the Northern shelterbelt program aimed  
106 to afforest northern parts China, it has had some positive partial effects diminishing storm erosion and  
107 desertification (Wang et al., 2010), despite increased precipitation in afforested regions (Li et al., 2021).  
108 The impact of human intervention, mainly by afforestation have proved to explain an 87% of greening  
109 advance in the Kubuqi Desert of Inner Mongolia (Ren et al., 2022) where, moreover, the afforestation  
110 program providing evidence of temperature smoothing (Wang et al., 2018), despite potential damage to  
111 native biodiversity (Yao et al., 2021).

## 112 **6.3. European Mediterranean Basin:**

113 EU water policy, primarily driven by the EU Water Framework Directive (WFD, 2000), emphasizes  
114 the need for robust integrated water resource management systems based on river basin planning principles

115 (Quevauviller, 2014). This policy aims to address drought by promoting risk management policies,  
116 enhancing drought preparedness and mitigation, and considering financial assistance tools (Wilhite et al.,  
117 2014). In recent decades, stakeholders in Southern Europe have successfully adapted to drought through  
118 measures such as transitioning to drought-resistant crop species (Costa et al., 2016; Zhao et al., 2022),  
119 restoring vegetation, reforestation, afforestation (Mechler & Kundzewicz, 2010; Pietrapertosa et al., 2018),  
120 and implementing drought monitoring and assessment (Hervás-Gámez & Delgado-Ramos, 2019) (Table  
121 S1).

122 At the national level in Spain, the National Indicator System for Droughts, established in 2005,  
123 has played a significant role in implementing effective measures and actions governed by the National  
124 Government (Estrela & Sancho, 2016).

125 While the EU's Water Framework Directive provides a comprehensive framework, challenges  
126 persist in areas such as reservoir regulation, aquifer management, and nutrient management (Hering et al.,  
127 2010). The use of aquifers in Southern Europe, while a valuable water source, faces issues like  
128 overexploitation (causing aquifer depletion), pollution, and salinization near coastal areas that necessitate  
129 proper legislation and assessment (Estrela & Vargas, 2011). Drought adaptation has mainly included  
130 selecting more drought-resistant plant and livestock genotypes, adjusting planting seasons, and shifting  
131 crops northward (Iglesias et al., 2011a; Rodrigo-Comino et al., 2021) (Table S1).

#### 132 **6.4 Australia**

133 Due to the region's socio-economic and technical capabilities and its integration into the Australian state  
134 and commonwealth, stakeholders have demonstrated high awareness and effective tools to mitigate the  
135 multifaceted impacts of drought (Kiem & Austin, 2013) (Table S1). Consequently, various governmental  
136 programs and plans have been executed to prevent drought impacts, conserve water, support afforestation,  
137 enhance water use efficiency, and provide economic compensation to affected stakeholders and enterprises  
138 (Herron et al., 2002; Kiem & Austin, 2013).

139 Enormous financial resources from Commonwealth and State Governments, communities, and  
140 individuals have been invested in drought mitigation. For instance, during the millennium drought (2001-  
141 2009), the cost of mitigating losses, replacing ecosystem services, and adapting to new ecosystem equilibria  
142 in the Murray-Darling river basin alone was estimated at \$810 million (Banerjee et al., 2013). Water trade  
143 strategies have shown that determining water supply prices for various activities can be challenging, with  
144 solutions to one problem sometimes creating larger ones (Edwards et al., 2008; Kiem, 2013) (Table S1).  
145 Notably, infrastructure projects focusing on water conservation at various levels have achieved success  
146 (Kiem, 2013), along with ecosystem restoration and reforestation efforts (Hobbs et al., 2016). In the  
147 Melbourne region, the development of water harvesting systems from stormwater and water recycling has  
148 substantially increased water supply capacity for urban and agricultural use. However, sustaining these  
149 improvements amid growing consumption and increasing aridity remains a challenge (Low et al., 2015).  
150 While successful initiatives have been implemented, there is still much to learn about effectively addressing  
151 aridity in this economically powerful country. Integrating science and technology into stakeholders' daily  
152 practices has been identified as a key approach to advancing drought adaptation (Howden et al., 2014).

#### 153 **6.5 North Brazil**

154 The Semi-Arid region of Brazil (SAB) faces significant aridity challenges. During the period 1973-2001  
155 (P1), governmental policies focused on "combatting drought and its effects." In contrast, the period 2002-  
156 2016 (P2) adopted the concept of "coexistence with semi-aridity" as the guiding policy principle. A  
157 comparative analysis of 10 territories within SAB showed substantial improvements during both periods,  
158 including increased access to water infrastructure (+33%), diversification of production systems (Livestock  
159 +36%; Crops +61%), enhanced political organizing (+24%), and better access to public programs (+29%)  
160 (Table S1). Measures aligned with the concept of coexistence with aridity, such as creating resource  
161 reserves for drought periods, reforestation, afforestation, and improved collaboration among diverse actors,  
162 have been particularly successful. Shade from trees has protected crops from heat and wind, increased  
163 productivity, preserved water sources, and enhanced biodiversity (Altieri & Nichols, 2017). Innovations  
164 like Family Seed Reserves (FSR) and Community Seed Banks (CSB) have been instrumental (Almeida &  
165 Cordeiro, 2001). Soil conservation practices, including diffusion and infiltration canals, terraces, stone  
166 barriers, and living barriers of cacti, have regulated water flow and increased water infiltration, reducing  
167 soil erosion by 80% (Pérez-Marin et al., 2007) and boosting soil organic matter levels by 25-150%  
168 (Menezes et al., 2002; Tiessen et al., 2003).

169 Integrated water resources management, especially for rain-fed agriculture, remains essential  
170 (Campos, 2015). More proactive, knowledge-based actions, including seasonal climate forecasts and  
171 studies on drought impacts, are needed to address contemporary environmental risks and prevent  
172 irreversible climate change (Marengo et al., 2021) (Table S1).

173  
174  
175

## 176 **6.6. South West North America**

177 Over the past few decades, droughts in the Southwestern USA have been characterized by exceptionally  
178 high temperatures (MacDonald, 2010). Unfortunately, the future doesn't look promising, as climate models  
179 predict increased aridity and more severe droughts throughout the 21st century. Additionally, there will  
180 likely be a decrease in rainfall frequency but an increase in intensity, which can exacerbate soil erosion  
181 (Archer & Predick, 2023).

182 Significant changes have already been observed in the timing of snowmelt in the Southwest USA  
183 (Fritze et al., 2011). Since snowmelt contributes significantly to the region's stream flows (30% to 75%  
184 depending on the basin), a reduction in total snowpack has significant economic consequences, and  
185 especially since irrigation agriculture heavily relies on groundwater resources (Hunter et al., 2006).  
186 Unfortunately, overexploitation of groundwater has been a constant issue in the region. Furthermore,  
187 aquifer drawdown and saltwater intrusion in the Phoenix area limit further groundwater extraction (Gober,  
188 2010; MacDonald, 2007).

189 Regional population growth and economic expansion are projected to intensify domestic water  
190 demand, which is expected to increase even without additional transfers from rivers (Table S1).  
191 Transferring water from agriculture to meet domestic demands raises concerns about rural sustainability  
192 and food security (MacDonald, 2010; Steele et al., 2010).

193 In dryland areas of North America, desertification resulting from increased aridity is strongly  
194 linked to wind erosion and dust transport (Duniway et al., 2019) (Table S1). While dryland soils are  
195 generally stable when intact, disturbances such as fires, livestock grazing, and off-highway vehicle use can  
196 dramatically increase wind erosion, sometimes by as much as 40-fold. Innovative approaches to dryland  
197 restoration that minimize surface disturbance may help achieve restoration goals while limiting wind  
198 erosion risks. Addressing this complex issue requires multidisciplinary and multijurisdictional approaches  
199 and perspectives (Duniway et al., 2019). However, research on native species like *Pinus ponderosa* has  
200 shown promise in breeding and selecting drought-resistant genotypes (Kolb et al., 2016).

201

202

203

#### 204 Supplementary references

- 205 1. Altieri, M.A. & Nicholls, C.L. (2017). The adaptation and mitigation potencial of traditional  
206 agricultura in a changing climate. *Climate Change*, 140, 33–45.
- 207 2. Archer, S.R., & Predick, K. I. (2023). Climate change and ecosystems of the Southwestern United  
208 States. *Rangelands*, 30, 23-28.
- 209 3. ARMONIA (2007), Assessing and mapping multiple risks for spatial planning, European Union  
210 6th Framework Programme Reports, European Union.
- 211 4. Baba, I. (2014). Challenges of poverty eradication and sustainable development among the  
212 Kanuri in the Sahel Region of Yobe State in Nigeria. *International Journal of Social Work and*  
213 *Human Services Practice*, 2, 124-129.
- 214 5. Banerjee, O., Bark, R., Connor, J., & Crossman, N.D. (2013). An ecosystem services approach  
215 to estimating economic losses associates with drought. *Ecological Economics*, 91, 19-27.
- 216 6. Berhanu, W., & Beyene, F. (2015). Climate variability and household adaptation strategies in  
217 southern Ethiopia. *Sustainability*, 7, 6353-6375.
- 218 7. Campos, J.N.B. (2015). Paradigms and public policies on drought in Northeast Brazil: A  
219 historical perspective. *Environmental Management*, 55, 1052-1063.
- 220 8. Chen, D., Saleem, M., Cheng, J., Mi, J., Chu, P., Tuvshintogtokh, I., Hu, S., & Bai, Y., (2019).  
221 Effects of aridity on soil microbial communities and functions across soil depths on the  
222 Mongolian Plateau. *Functional Ecology*, 33, 1561–1571. [https://doi.org/10.1111/1365-](https://doi.org/10.1111/1365-2435.13359)  
223 [2435.13359](https://doi.org/10.1111/1365-2435.13359)
- 224 9. Chen, F., Huang, W., Jin, L., Chen, J., & Wang, J. (2011). Spatiotemporal precipitation variations  
225 in the arid Central Asia in the context of global warming. *Sciences China Earth Science*, 54(12),  
226 1812–1821, doi:10.1007/s11430-011-4333-8.
- 227 10. Costa, J.M., Vaz, M., Escalona, J., Egipto, R., Lopes, C., Medrano, H., & Chaves, M.M. (2016).  
228 Modern viticulture in Southern Europe: Vulnerabilities and strategies for adaptation to water  
229 scarcity. *Agricultural Water Management*, 174, 5-18.
- 230 11. Darkoh, M.B.K. (1998). The nature, causes and consequences of desertification in the drylands  
231 of Africa. *Land Degradation and Development*, 9, 1–20.
- 232 12. Davis, C.L. & Vincent, K. (2017). Climate Risk and Vulnerability: A Handbook for Southern  
233 Africa, 2nd ed.; CSIR: Pretoria, South Africa, p. 202.
- 234 13. Duniway, M.C., Pfennigwerth, A.A., Fick, S.E., Nauman, T.W., Belnap, J., & Barger, N.N.  
235 (2019). Wind erosion and dust from US drylands: a review of causes, consequences, and solutions  
236 in a changing world. *Ecosphere*, 10, e02650.
- 237 14. Edwards, B., Gray, M., & Hunter, B. (2008). A sunburnt country: the economic and financial  
238 impact of drought on rural and regional families in Australia in an era of climate change.  
239 *Australian Journal of Labour Economics*, 12(1), 109–131
- 240 15. Eliza, M.J., Leo, C.Z., & Kalipeni, E. (2015). Oil discovery in Turkana County, Kenya: A source  
241 of conflict or development? *African Geographical Review*, 34(2), 142–164.
- 242 16. Estrela, T., & Sancho, T.A. (2016). Drought management policies in Spain and the European  
243 Union: from traditional emergency actions to drought management plans. *Water Policy*, 18, 153-  
244 176.

- 245 17. Estrela, T., & Vargas, E. (2012). Drought management plans in the European Union. The case of  
246 Spain. *Water Resource Management*, 26, 1537-1553.
- 247 18. Feng, X., et al. (2016). Revegetation in China's Loess Plateau is approaching sustainable water  
248 resource limits. *Nature Climate Change*, 6(11), 1019–1022, doi:10.1038/nclimate3092.
- 249 19. Fritze, H., Stewart, I.T., Pebesma, E. (2011). Shifts in western north American snowmelt runoff  
250 regimes for the recent warm decades. *Journal of Hydrometeorology*, 12, 989-1006.
- 251 20. Garrido, A., & Rabi, A. (2016). Managing Water in the 21<sup>st</sup> Century Challenges and  
252 Opportunities. Proceedings of the 8<sup>th</sup> Rosenberg International Forum of Water Policy. University  
253 of California.
- 254 21. Gill, J. C., & B. D. Malamud (2014), Reviewing and visualizing the interactions of natural  
255 hazards. *Review of Geophysics*, 52, 680–722, doi:10.1002/2013RG000445
- 256 22. Gober, P.A, & Kirkwood C.W. (2010). Vulnerability assessment of climate-induced water  
257 shortage in Phoenix. *Proceedings of National Academy of Sciences USA*, 107, 21295–21299.
- 258 23. Hering, D., Botja, A., Carstesen, J., Carvalho, L., Elliott, M., Feld, C.K., Heiskanen, A.S.,  
259 Johnson, R.K., Moe, D., Solheim, A.L., & van de Bund, W. (2010). The European water  
260 framework directive at the age of 10: a critical review of the achievements with recommendations  
261 for the future. *Science of the Total Environment*, 408, 4007-4019.
- 262 24. Herron, N., Davis, R., & Jones, R. (2002). The effects of large-scale afforestation and climate  
263 change on water allocation in the Macquarie River catchment, NSW, Australia. *Journal of  
264 Environmental Management*, 65, 369-381.
- 265 25. Hervás-Gámez, C., & Delgado-Ramos, F. (2019). Drought Management Planning Policy: From  
266 Europe to Spain. *Sustainability*, 11, 1862.
- 267 26. Hobbs, T.J., Neumann, C.R., Meyer, W.S., Moon, T., & Bryan, B.A. (2016). Models of  
268 reforestation productivity and carbon sequestration for land use and climate change adaptation  
269 planning in South Australia. *Journal of Environmental Management*, 181, 279-288.
- 270 27. Hochard, J. 2021. Investigating wisely in land restoration. *Nature Sustainability*, 5, 3-4.
- 271 28. Howden, M., Schroeter, S., Crimp, S., Hanigan, I. (2014). The changing roles of science in  
272 managing Australian droughts: an agricultural perspective. *Weather and Climate Extremes*, 3,  
273 8089.
- 274 29. Hunter, T., Tootle, G., & Piechota, T. (2006). Oceanic-atmospheric variability and western U.S.  
275 snowfall. *Geophysical Research Letters*, 33(13), L13706.
- 276 30. Iglesias, A., Mougou, R., Moneo, M., & Quiroga, S. (2011a). Towards adaptation of agriculture  
277 to climate change in the Mediterranean. *Regional Environmental Change*, 11, S159-S166.
- 278 31. Iglesias, A., Garrote, L., Diz, A., Schlickerrieder, J., & Martin-Carrasco, F. (2011b). Re-thinking  
279 water policy priorities in the Mediterranean region in view of climate change. *Environmental  
280 Science and Policy*, 14, 744-757.
- 281 32. Jedd, T., Russell Fragaszy, S., Knutson, C., Hayes, M.J., Fraj, M.B., Wall, N. M., Svoboda, M.,  
282 & MacDonnell, R. (2021). Drought management norms: Is the middle East and North Africa  
283 region managing risks or crises? *Journal of Environment and Development*, 30, 3-40.
- 284 33. Kappes, M. S., Keiler, M., Von Elverfeldt, K., & Glade, T. (2012). Challenges of analyzing multi-  
285 hazard risk: A review. *Nature Hazards*, 64(2), 1925–1958, doi:10.1007/s11069-012-0294-2.
- 286 34. Keita, A., Niang, D., Sandwidi, S. A. 2022. How non-governmental-organization-built small-  
287 scale irrigation systems are a failure in Africa. *Sustainability*, 14, 11315.
- 288 35. Kiem, A.S., & Austin, E.K. (2013). Drought and the future rural communities Opportunities and  
289 challenges for climate change adaptation in regional Victoria, Australia. *Global Environmental  
290 Change*, 23, 1307-1316.
- 291 36. Kiem, A.S. 2013. Drought and water policy in Australia: Challenges for the future illustrated by  
292 the issues associated with water trading and climate change adaptation in the Murray-Darling  
293 Basin. *Global Environmental Change*, 23, 1615-1626.
- 294 37. Kolb, T.E., Grady, K. C., McEtrick, M.P., & Herrero, A. (2016). Local-scale drought adaptation  
295 of Ponderosa pine seedlings at habitat ecotones. *Forest Science*, 62, 641-651
- 296 38. Kurosaki, Y., Shinoda, M., Mikami, M., & Nandintsetseg, B. (2011b). Effects of soil and land  
297 surface conditions in summer on dust outbreaks in the following spring in a Mongolian grassland.  
298 *SOLA*, 7(1), 69–72, doi:10.2151/sola.2011-018.
- 299 39. Li, C., Fu, B., Wang, S., Stringer, L. C., Wang, Y., Li, Z., Liu, Y., Zhou, W. (2021). Drivers and  
300 impacts of changes in China's drylands. *Nature Reviews Earth and Environment*, 2, 858-873.
- 301 40. Lioubimtseva, E., & Cole, R. (2007). Uncertainties of climate change in arid environments of  
302 Central Asia. *Reviews in Fisheries Science*, 14, 29-49.
- 303 41. Lioubimtseva, E., Henebry, G.M. 2009. Climate and environmental change in arid Central Asia:  
304 Impacts, vulnerability and adaptations. *Journal of Arid Environments*, 73, 963-977.

- 305 42. Li, W.J., & Lu, C.H. (2015). Aridity trend and response to vegetation restoration in the loess hilly  
306 region of northern Shaanxi province. *Journal of Geographic Sciences*, 25, 289-300.
- 307 43. Low, K.G., Grant, S.B., Hamilton, A.J., Gan, K., Saphores, J.D., Arora, M., & Feldman, D.L.  
308 (2015). Fighting drought with innovation: Melbourne's response to the Millennium drought in  
309 Southeast Australia. *Wires Water*, 2, 315-328.
- 310 44. Ma, X., Zhu, J., Yan, W., & Zhao, C. (2021). Projections of desertification trends in Central Asia  
311 under global warming scenarios. *Science of the Total Environment*, 781, 146777
- 312 45. Marengo, J. A., Galdos, M.V., Challinor, A., Cunha, A.P., Marin, F.R., dos Santos Vianna, M.,  
313 Avala, R.C.S., Alves, L.M., Moraes, O.L., & Bender, F. (2021). Drought in Northeast Brazil: A  
314 review of agricultural and policy adaptation options for food security. *Climate Resilience and*  
315 *Sustainability*, 1, e17.
- 316 46. MacDonald, G.M. (2007) Severe and sustained drought in southern California and the West:  
317 Present conditions and insights from the past on causes and impacts. *Quaternary International*,  
318 173-174, 87-100.
- 319 47. MacDonald, G.M. (2010). Water, climate change, and sustainability in the southwest.  
320 *Proceedings of the National Academy of Sciences USA*, 105, 21256-21262
- 321 48. Mechler, R., & Kundzewicz, Z.W. (2010). Assessing adaptation to extreme weather events in  
322 Europe-Editorial. *Mitigation and Adaptation Strategies for Global Changes*, 15, 611-620.
- 323 49. çMaïga-Yaleu, S.B., Chivenge, P., Yacouba, H., Guigemde, I., Karambiri, H., Ribolzi, O., Bary,  
324 A., & Chaplot, V. (2015). Impact of sheet erosion mechanisms on organic carbon losses from  
325 crusted soils in Sahel. *Catena*, 126, 60-67.
- 326 50. Menezes, R.S.C., Salcedo, I.H. & Elliott, E.T. (2002). Microclimate and nutrient dynamics in a  
327 silvopastoral system of semiarid northeastern Brazil. *Agroforestry Systems*, 56, 27-38
- 328 51. Msangi, J.P. (2004). Drought hazard and desertification management in the drylands of Southern  
329 Africa. *Environmental Monitoring and Assessment*, 99, 75-87.
- 330 52. Mustaeva, N., & Kartayeva, S. (2018). Status of climate change adaptation in Central Asian  
331 Region. In: Status of Climate Change Adaptation in Central Asian Region. Springer Climate  
332 Book Series. New York.
- 333 53. Nandintsetseg, B., & Shinoda, M. (2015). Land surface memory effects on dust emission in a  
334 Mongolian temperate grassland, *Journal of Geophysics Research Biogeosciences*, 120, 414-427,  
335 doi:10.1002/2014JG002708.
- 336 54. Nhamo, L., Mabhaudhi, T., & Modi, A. (2019a). Preparedness or repeated short-term relief aid?  
337 Building drought resilience through early warning in southern Africa. *Water SA*, 45, 75-85.
- 338 55. Nhamo, L., Matchya, G., Mabhaudhi, T., Nhlengethwa, S., Nhemachena, C., & Mpandeli, S.  
339 2019b. Cereal production trends under climate change: impacts and adaptation strategies in South  
340 Africa. *Agriculture*, 9, 30.
- 341 56. Nhemachena, C., Nhamo, L., Matchaya, G., Nhemachena, C., R., Muchara, B., karuaihe, S.T.,  
342 Mpandeli, S. (2020). Climate change impacts on water and agriculture sectors in southern Africa:  
343 threats and opportunities for sustainable development. *Water*, 12, 2673
- 344 57. O'Connor, D., & Ford, J. (2014). Increasing the effectiveness of the "Great Green Wall" as an  
345 adaptation to the effects of climate change and desertification in the Sahel. *Sustainability*, 6, 7142-  
346 7154.
- 347 58. Pérez-Martin, A.M., Menezes, R.S.C., & Salcedo, I.H. (2007). Produtividade de milho solteiro  
348 ou em aléias de gliricídia adubado com duas fontes orgânicas. *Pesquisas Agropecuaria Brasil*,  
349 42, 669-677.
- 350 59. Pietrapertosa, F., Khokhlov, V., Salvia, M., & Cosmi, C. (2018). Climate change adaptation  
351 policies and plans: a survey in 11 South East European countries. *Renewable and Sustainable*  
352 *Energy Reviews*, 81, 3041-3050.
- 353 60. Ren, M., Chen, W., Wang, H. 2022. Ecological policies dominated the ecological restoration  
354 over the core regions of Kubuqi desert in recent decades. *Remote Sensing*, 14, 5243
- 355 61. Rodrigo-Comino, J., Salvia, R., Quarnta, G., Cudlín, P., Salvato, L., Gimenez-Morera, A. (2021).  
356 Climate aridity and the geographical shift of Olive trees in a Mediterranean Northern Region.  
357 *Climate*, 9, 64.
- 358 62. Schlüter, M., & E. Herrfahrdt-Pähle, E. (2011). Exploring resilience and transformability of a  
359 river basin in the face of socioeconomic and ecological crisis: an example from the Amudarya  
360 river basin, Central Asia. *Ecology and Society*, 16(1), 32.
- 361 63. Shiferaw, B., Tesfaye, K., Kassie, M., Abate, T., Prasanna, B.M., & Menkir, A. (2014). Managing  
362 vulnerability to drought and enhancing livelihood resilience in sub-Saharan Africa:  
363 Technological, Institutional and policy options. *Weather and Climate Extremes*, 3, 67-79.

- 364 64. Sowers, J., Vengosh, A., & Weinthal, E. (2011). Climate change, water resources, and the politics  
365 of adaptation in the middle east and north Africa. *Climate Change*, 104, 599-627
- 366 65. Steele, C., Reyes, J., Elias, E., Aney, S., & Rango, A. (2018). Cascading impacts of climate  
367 change on southwestern US cropland agriculture. *Climatic Change*, 148, 437-450.
- 368 66. Tiessen, H., Menezes, R.S.C., Salcedo, I.H., Wick, B. (2003) Organic matter transformations and  
369 soil fertility in a treed pasture in semi-arid NE Brazil. *Plant and Soil*, 252, 195–205.
- 370 67. Waha, K., Krummenauer, L., Adams, S., Aich, V., Baarsch, F., Coumou, D., Fader, M., Hoff, H.,  
371 et al. (2017). Climate change impacts Middle East and Northern Africa (MENA) region and their  
372 implications for vulnerable population groups. *Regional Environmental Change*, 17, 1623-1638.
- 373 68. Wang, L., Lee, X., Schultz, N., Chen, S., Wei, Z., Fu, C., Gao, Y., Yang, Y., Lin, G. 2018.  
374 Response of surface temperature to afforestation in the Kubuqi desert, inner Mongolia. *Journal*  
375 *of Geophysical Research: Atmospheres*, 123, 948-964.
- 376 69. Wang, Z., Peng, D., Xu, D., Zhang, X. & Zhang, Y. (2020). Assessing the water footprint of  
377 afforestation in inner Mongolia, China. *Journal of Arid Environments*, 182, 104257.
- 378 70. Wang, H., Chen, Y., & Chen, Z. (2013). Spatial distribution and temporal trends of mean  
379 precipitation and extremes in the arid region, northwest of China, during 1960—2010,  
380 *Hydrological Processes*, 27(12), 1807–1818, doi:10.1002/hyp.9339.
- 381 71. Wilhite, D., Sivakumar, M.V.K., Pulwarty, R. (2014). Managing drought risk in a changing  
382 climate: the role of national drought policy. *Weather and Climate Extremes*, 3, 4-13.
- 383 72. WFD 2000. <https://www.eea.europa.eu/policy-documents/water-framework-directive-wfd-2000>.
- 384 73. Wodon, Q., Liverani, A., Joseph, G., & Bougnoux, N. (2014). Climate change, migration, and  
385 adaptation in the MENA region. In: Climate Change and Migration: Evidence from the Middle  
386 East and North Africa. Wodon, Q., Liverani, A., Joseph, G., Bougnoux, N. (eds). Washington  
387 D.C. World Bank.
- 388 74. Xiao, Y., Xiao, Q., & Sun, X. (2020). Ecological risk arising from the impact of large-scale  
389 afforestation on the regional water supply balance in southwest China. *Scientific Reports*, 10,  
390 4150. Yang, Z., Gao, X., Lei, J., Meng, X., & Zhou, N. (2022). Analysis of spatiotemporal  
391 changes and driving factors of desertification in the Africa Sahel. *Catena*, 213, 106213.
- 392 75. Yang, X., Zhang, K., Jia, B., & Ci, L. (2005). Desertification assessment in China: An overview.  
393 *Journal of Arid Environments*, 63(2), 517–531, doi:10.1016/j.jaridenv.2005.03.032
- 394 76. Yao, Z., Xiao, J., Ma, X. 2021. The impact of large-scale afforestation on ecological environment  
395 in Gobi region. *Scientific Reports*, 11, 14383.
- 396 77. Yuan, Z.Q., Yu, K.L., Epstein, H., Fang, C., Li, J.T., Liu, Q.Q., Liu, X.W., Gao, W.J., & Li, F.M.  
397 (2016). Effects of legume species introduction on vegetation and soil nutrient development on  
398 abandoned croplands in a semi-arid environment on the Loess Plateau, China. *Science of The*  
399 *Total Environment*, 541, 692-700.
- 400 78. Xu, D., X. Kang, D. Qiu, D. Zhuang, & J. Pan (2009). Quantitative assessment of desertification  
401 using landsat data on a regional scale—A case study in the Ordos Plateau, China. *Sensors*, 9(3),  
402 1738–1753, doi:10.3390/s90301738.
- 403 79. Zhao, J., Bindi, M., Eitzinger, J., Ferrise, R., Gaile, Z., Gobin, A., Holzkämper, A., Kersebaum,  
404 K.G., Kozyra, J., Kriaciunienė, Z., Loit, E., Nejedlik, T., Nendel, C., Niinemets, Ü., Palouso, T.,  
405 Peltonen-Sainio, P., Potopová, V., Ruis-Ramos, M., Reidsma, P., Rijk, B., Trnka, M., van  
406 Ittersum, M. K., & Oleesen, J.E. (2022). Priority for climate adaptation measures in European  
407 crop production systems. *European Journal of Agronomy*, 138, 126516.
- 408 80. Zhou, Y.Y., Fu, D.J., Lu, C.X., Xu, X.M., Tang, Q.H. (2021). Positive effects of ecological  
409 restoration policies on the vegetation dynamics in a typical ecologically vulnerable area of China.  
410 *Ecological Engineering*, 159, 106087.
- 411 81. Zou, J., Ding, J., Welp, M., Huang, S., Liu, B. (2020). Assessing the response of ecosystem water  
412 use efficiency to drought during and after drought events across Central Asia. *Sensors*, 20, 581.
- 413
